# Supplementary material for: Lignosulfonate-Assisted In Situ Deposition of Palladium Nanoparticles on Carbon Nanotubes for the Electrocatalytic Sensing of Hydrazine
Source: MDPI journal article supplement (doi:10.3390/molecules28207076), 2023-10-13
Supplement: s1 [file s1]

# Lignosulfonate-assisted in situ deposition of palladium nanoparticles on carbon nanotubes for the electrocatalytic sensing of hydrazine

Patrycja Płócienniczak<sup>1</sup>, Tomasz Rębiś<sup>2\*</sup>, Amanda Leda<sup>2</sup>, Grzegorz Milczarek<sup>2\*</sup>

<sup>1</sup>*Faculty of Chemistry, Adam Mickiewicz University, Uniwersytetu Poznańskiego 8, 61-614 Poznań, Poland*

<sup>2</sup>*Institute of Chemistry and Technical Electrochemistry, Poznan University of Technology, Berdychowo 4, 60-965 Poznań, Poland*

## Supporting Material

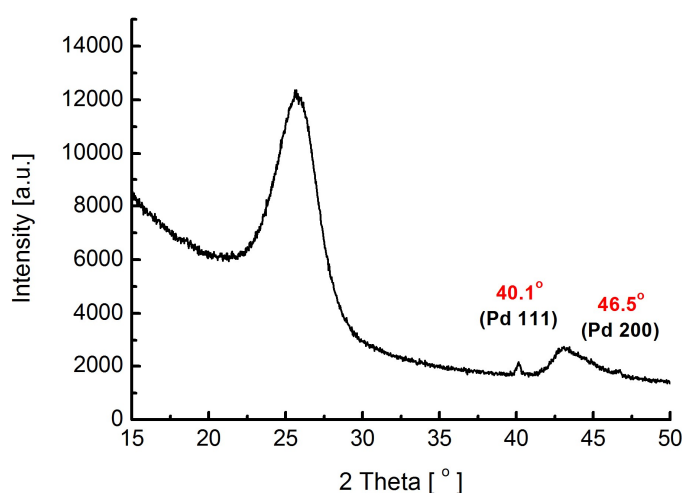

**Fig. S 1.** XRD profile of MWCNT/LS/NPd hybrid material with the indication of characteristic palladium peaks.

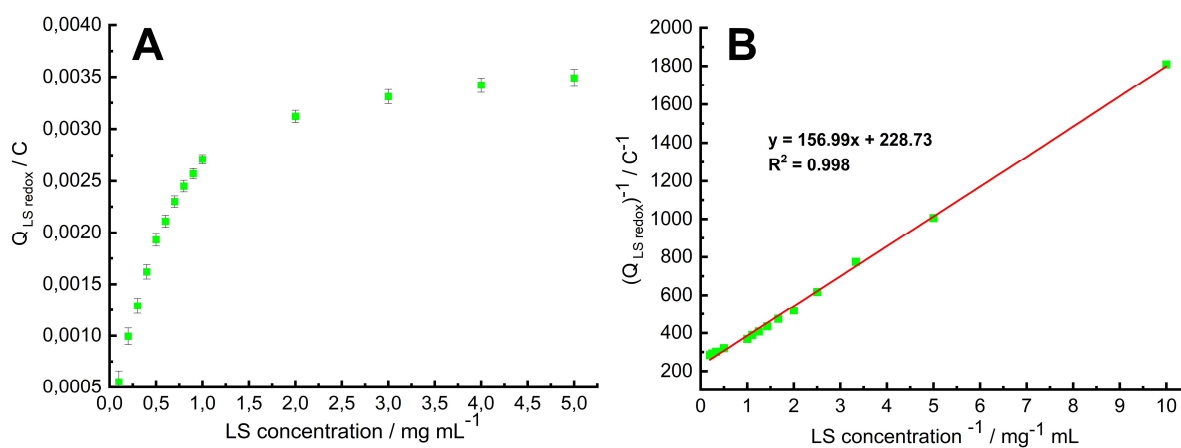

**Fig. S 2.** (A) LS redox peak charge measured for different MWCNT/LS samples as a function of the LS concentration used for synthesis (concentration range 0.1 to 20.0 mg mL<sup>-1</sup>). (B) Relationship between the inverse of the redox peak charge and the inverse of the LS concentration.

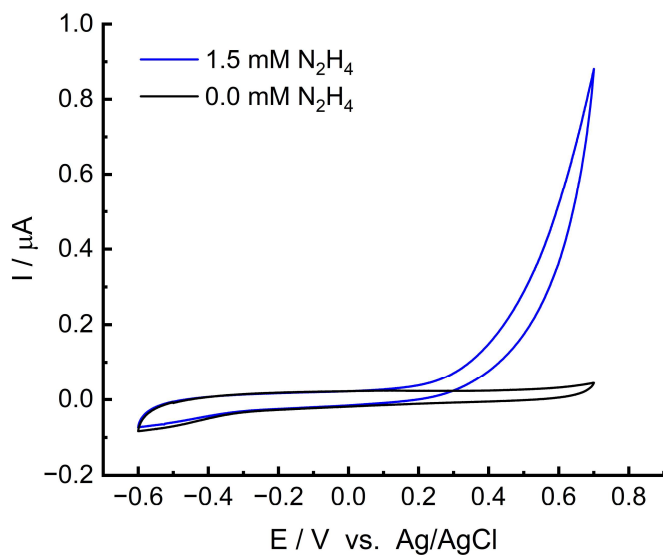

**Fig. S 3.** CV of bare GC electrode recorded in 0.05 M PB buffer in the absence and presence of 1.5 mM  $\text{N}_2\text{H}_4$ . Scan rate: 10 mV s<sup>-1</sup>.

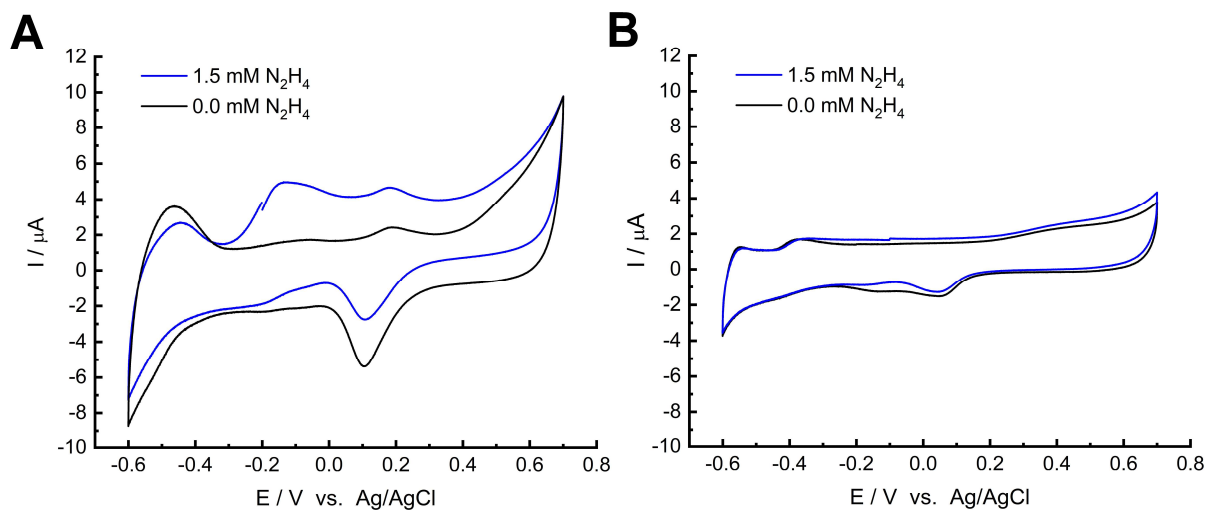

**Fig. S 4.** Cyclic voltammograms registered in 0.05 M PB buffer solution before and after the addition of 1.5 mM  $\text{N}_2\text{H}_4$  at (A) GC/MWCNT/LS/NPd and (B) GC/MWCNT/NPd. Scan rate 10 mV s<sup>-1</sup>.

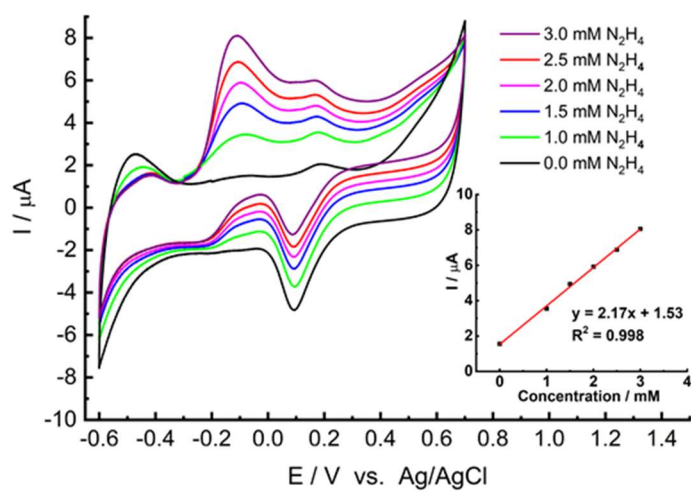

**Fig. S 5.** CVs of GC/MWCNT/LS/NPd, recorded for subsequent hydrazine additions in PB buffer solution (0.05 M) at a scan rate of 10 mV s<sup>-1</sup>. The inset is the plot of peak current versus concentration of hydrazine at -0.09 V.

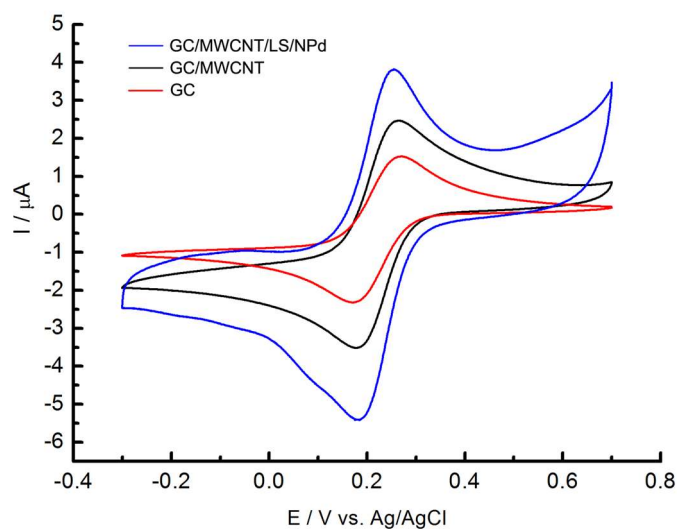

**Fig. S 6.** Cyclic voltammograms recorded at bare GC, GC/MWCNT and GC/MWCNT/LS/NPd in the presence of 1.0 mM [Fe(CN)<sub>6</sub>]<sup>3-</sup> at 10 mV s<sup>-1</sup>. Supporting electrolyte is PB buffer, pH 7.4.

According to Randles-Sevcik:

$$I_p = 2.69 \times 10^5 n^{3/2} A C D^{1/2} \nu^{1/2}$$

$$A (\text{GC}) = 0.03 \text{ cm}^2$$

$$A (\text{GC/MWCNT}) = 0.046 \text{ cm}^2$$

$$A (\text{GC/MWCNT/LS/NPd}) = 0.069 \text{ cm}^2$$

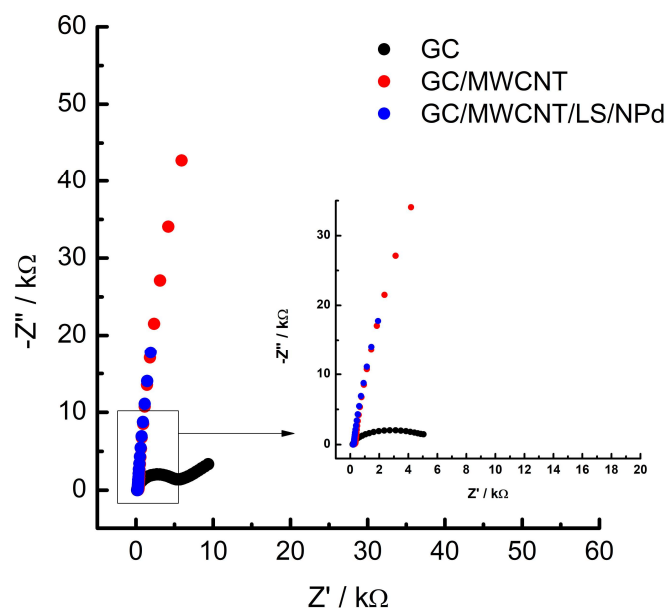

**Fig. S 7.** Nyquist diagrams of electrodes in PB solution (pH 7.4) containing 1 mM  $[\text{Fe}(\text{CN})_6]^{3-/4-}$ .

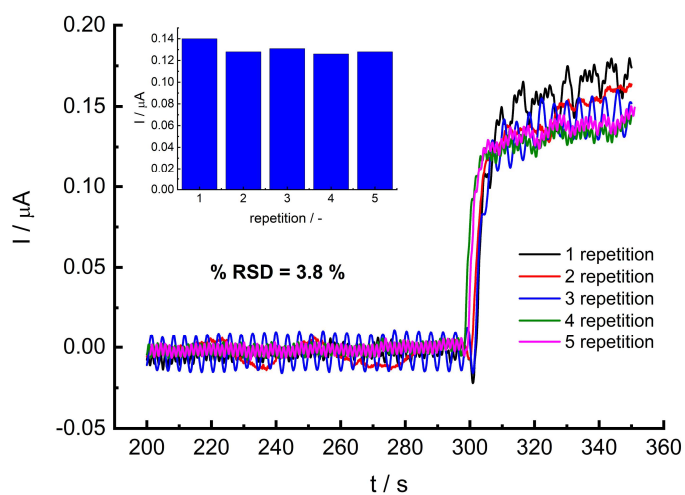

**Fig. S 8.** Repeatability of GC/MWCNT/LS/NPd for the detection of hydrazine (50  $\mu\text{M}$ ) in PB buffer. Operation potential 0.0 V.

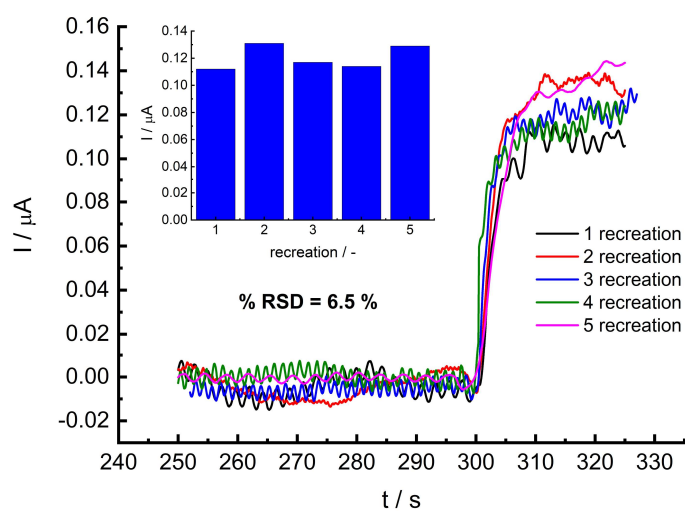

**Fig. S 9.** Reproducibility of GC/MWCNT/LS/NPd for the detection of hydrazine (50  $\mu\text{M}$ ) in PB buffer. Operation potential 0.0 V.

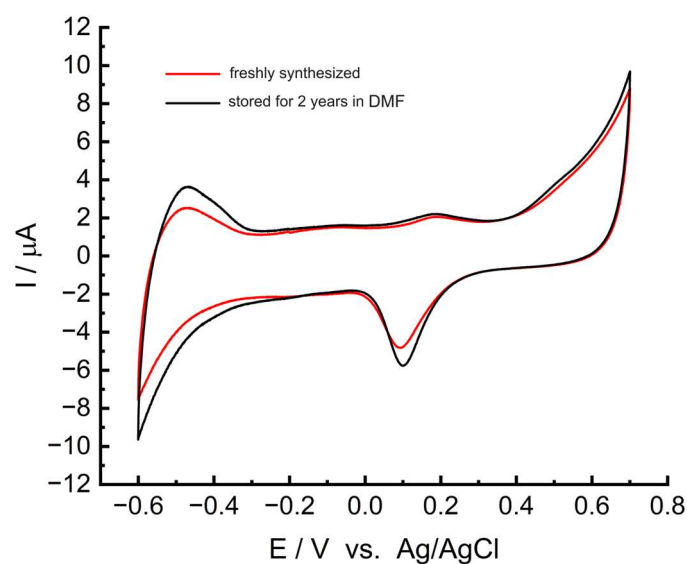

**Fig. S 10.** Cyclic voltammograms were recorded in 0.05 M PB buffer solution on identical GC/MWCNT/LS/NPd electrodes. The first electrode incorporated the freshly synthesized hybrid material, while the second one contained the hybrid material that had been stored in DMF for 2 years. Scan rate 10  $\text{mV s}^{-1}$ .

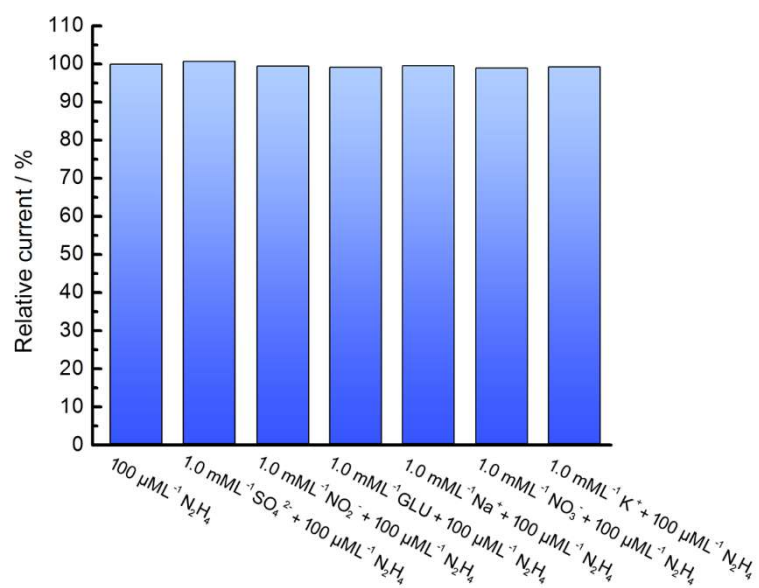

Fig. S 11. Interfering effect during hydrazine detection at GC/MWCNT/LS/NPd.
